# Supplementary material for: Physical fitness predicts technical-tactical and time-motion profile in simulated Judo and Brazilian Jiu-Jitsu matches
Source: PeerJ. 2018 May 25;6:e4851. doi: 10.7717/peerj.4851 (PMC5971839; doi:10.7717/peerj.4851)
Supplement: Supplemental Information 1 [file peerj-06-4851-s001.xlsx]

## Sheet: Planilha1
Sujeito		Massa corporal	Estatura	Envergadura	C&F	Wells	Salto Vertical	Salto Horizontal	Barra c/ Gi	Barra c/ Gi	MedBall	Apoio de solo	Abdominais	vVO2max	VO2max	FCmax	Passagens	Estrangulamento	Chave articular	Alavanca de Comprimento	Alavanca Binária	Passagens	Estrangulamento	Chave articular	Alavanca de Comprimento	Alavanca Binária	Passagens	Estrangulamento	Chave articular	Alavanca de Comprimento	Alavanca Binária	Total de golpes	Total de êxitos	Efetividade	Tempo total em alta intensidade	Alta intensidade (%)	Número de blocos em AI	Tempo médio em AI por bloco	Razão E:P	Razão AI:BI	Passagens	Estrangulamento	Chave articular	Alavanca de Comprimento	Alavanca Binária
		(kg)	(cm)	(cm)	(seg)	(cm)	(cm)	(cm)	(reps)	(seg)	(m)	(reps)	(reps)	(km/h)	(ml/kg/min)	(bpm)	(min:seg,ms)	(min:seg,ms)	(min:seg,ms)	(min:seg,ms)	(min:seg,ms)	(n)	(n)	(n)	(n)	(n)	(n)	(n)	(n)	(n)	(n)	(n)	(n)	(%)	(min:seg,ms)	(%)	(n)	(min:seg,ms)			(%)	(%)	(%)	(%)	(%)
Sujeito	MODAL	MC	EST	ENV	CF	WELLS	SVERT	SHORIZ	GIREP	GISEG	MEDBALL	APOIO	ABS	VVO	VO	FCMAX	pasTT	estTT	chaTT	alcTT	albTT	pasFRQ	esFRQT	chaFRQ	alcFRQ	albFRQ	pasEXT	esEXTT	chaEXT	alcEXT	albEXT	tent	exit	efet	ttAI	aiPERC	aiNUM	aiBLC	ep	aibi	paspercentual	espercentualT	chapercentual	alcpercentual	albpercentual		MC
S1	1	70.15	176	178	21	25	50	230	10	30	4.7	29	53	14	49	175	00:01:01.418000	00:00:01.545000	00:00:00	00:00:04.618000	00:02:40.634000	11	0	2	2	3	1	0	0	2	1	20	4	20	00:03:20.528000	34.5334	18	00:00:11.140000	3.36472	0.713103	10.5769	0.266068	0	0.795276	27.6631		EST
S2	1	71	177	169	65	31.5	51	243	3	40	2.6	42	39	17	59.5	198	00:00:00	00:00:06.976000	00:00:00	00:00:14.780000	00:02:22.483000	9	0	1	6	4	0	0	0	3	0	20	3	15	00:02:47.842000	27.7334	20	00:00:08.392000	0	0.468559	0	1.15268	0	2.44217	23.5432		ENV
S3	1	85.35	175	180	58	30	46	215	3	60	5.8	37	39	16	56	190	00:02:04.842000	00:00:00	00:00:52.461000	00:00:13.400000	00:01:56.333000	13	6	9	1	8	6	1	8	1	8	48	25	52.0833	00:03:25.501000	33.6855	37	00:00:05.554000	2.26965	0.843787	20.464	0	8.59936	2.19652	19.0692		CF
S4	1	81.7	172	168	61	34.5	54	225	4	30	2.54	24	38	16	56	189	00:00:00	00:00:02.540000	00:00:00	00:00:05.997000	00:00:49.649000	2	0	0	4	7	0	0	0	1	0	13	1	7.69231	00:00:58.186000	9.66503	13	00:00:04.476000	3.43036	0.238484	0	0.421909	0	0.996136	8.24699		WELLS
S5	1	94.65	176	177	53	25	48	208	4	20	5.65	60	43	13	45.5	170	00:00:00	00:00:04.627000	00:00:04.998000	00:00:02.971000	00:01:33.253000	5	1	0	3	1	0	0	0	0	1	10	1	10	00:01:45.849000	17.5381	10	00:00:10.585000	2.66307	0.485962	0	0.766647	0.828118	0.492265	15.4511		SVERT
S6	1	93.5	188	196	71	13.5	25	243	4	28	3.03	34	39	16	56	194	00:00:49.780000	00:00:03.078000	00:00:36.103000	00:00:00	00:03:35.516000	8	4	1	1	3	1	1	1	0	1	21	5	23.8095	00:04:16.444000	42.3907	17	00:00:15.085000	2.30267	1.35649	8.22872	0.508799	5.96789	0	35.6252		SHORIZ
S7	1	77.5	179	183	55	37	48	206	5	37	4.52	36	40	14	49	172	00:00:00	00:00:00	00:00:02.623000	00:00:07.750000	00:00:46.599000	4	1	4	2	2	0	0	1	1	1	13	3	23.0769	00:01:30.189000	14.9006	13	00:00:06.938000	2.55856	0.389505	0	0	0.43336	1.28042	7.69887		GIREP
S8	1	76	172	179	15	24.6	35	221	4	32	3.72	35	39	15	52.5	183	00:02:08.915000	00:00:00	00:00:13.413000	00:00:00	00:02:51.535000	9	1	6	0	5	2	0	1	0	4	27	9	33.3333	00:03:48.390000	37.7162	21	00:00:10.876000	2.20221	0.913621	21.2889	0	2.21501	0	28.3272		GISEG
S9	1	81.2	180	182	75	38.5	40	236	8	63	2.07	46	36	17	59.5	199	00:00:00	00:00:00	00:00:00	00:00:00	00:00:11.038000	0	0	0	0	3	0	0	0	0	0	3	0	0	00:00:11.038000	1.82212	3	00:00:03.679000	3.39014	0.114234	0	0	0	0	1.82212		MEDBALL
S10	1	84	184	182	56	47	51	249	8	25	3.64	39	43	15	52.5	186	00:04:01.792000	00:00:00	00:00:00	00:00:02.410000	00:03:03.695000	12	0	4	1	0	3	0	1	1	0	26	5	19.2308	00:03:19.459000	32.8608	17	00:00:11.733000	2.53569	0.808382	39.8352	0	0	0.397047	30.2637		APOIO
S11	1	71.65	163	166	31	24	50	166	10	29	4.5	40	46	15	52.5	182	00:05:38.805000	00:00:00	00:00:00	00:00:00	00:01:36.194000	4	0	1	0	0	2	0	0	0	0	15	3	20	00:01:41.479000	16.7195	5	00:00:20.296000	7.01949	0.835493	55.8208	0	0	0	15.8487		ABS
S12	1	84.1	181	180.5	64	37	53	234	6	32	5.05	30	37	13	45.5	166	00:01:59.277000	00:00:00	00:00:03.360000	00:00:01.313000	00:01:42.885000	5	1	3	1	1	2	1	0	0	1	16	4	25	00:02:00.843000	20.0493	11	00:00:10.986000	5.46551	0.51337	19.7895	0	0.557464	0.217842	17.0698		VVO
S13	1	83.1	177	179.5	58	29.6	30	206	8	36	4.76	30	40	15	52.5	180	00:01:36.803000	00:00:00	00:00:00	00:00:18.101000	00:00:19.345000	2	0	0	2	2	0	0	0	0	1	12	3	25	00:00:37.446000	6.17664	6	00:00:06.241000	3.7857	0.320225	15.9675	0	0	2.98572	3.19092		VO
S14	1	83	178	183	87	44	56	275	12	36	3.98	38	48	15	52.5	171	00:00:12.640000	00:00:00	00:00:13.327000	00:00:06.430000	00:01:36.414000	9	2	3	1	2	1	0	0	1	1	19	4	21.0526	00:02:26.431000	24.2765	17	00:00:08.614000	0	0.409692	2.09556	0	2.20946	1.06602	15.9843		FCMAX
S15	1	80	174	180	86	30	50	244	4	11	4.03	26	53	13	45.5	199	00:00:00	00:00:00	00:00:00	00:00:00	00:02:07.017000	11	0	1	0	2	0	0	0	0	0	14	0	0	00:02:13.827000	23.047	14	00:00:09.559000	2.80704	0.649395	0	0	0	0	21.8743		imoTT
S16	1	75	178	181	87	38	52	259	10	25	5.07	42	35	13	45.5	192	00:00:56.417000	00:00:02.457000	00:00:58.778000	00:00:13.262000	00:00:54.403000	5	2	0	3	5	2	0	0	1	3	19	7	36.8421	00:02:08.900000	21.522	15	00:00:08.593000	3.22888	0.502094	9.41974	0.410236	9.81395	2.21431	9.08347		pasTT
S17	1	76	173	177	96	42	55	253	13	27	5.05	30	45	11	38.5	187	00:00:12.332000	00:00:13.089000	00:00:53.449000	00:00:12.126000	00:00:15.230000	3	3	0	5	2	1	1	0	3	1	15	6	40	00:01:33.894000	16.0443	13	00:00:07.223000	1.86449	0.415276	2.10726	2.23661	9.13321	2.07206	2.60246		estTT
S18	1	85.5	179	185	71	28	45	200	15	33	4.57	49	50	14	49	190	00:00:38.084000	00:00:01.857000	00:00:27.633000	00:00:00	00:01:54.874000	16	4	1	1	1	1	1	0	0	1	29	3	10.3448	00:02:34.382000	24.4627	23	00:00:06.712000	0.875936	0.711031	6.03463	0.294252	4.37861	0	18.2024		chaTT
S19	1	81	174	172	85	38	44	227	11	39	3.58	34	37	14	49	190	00:00:00	00:00:15.240000	00:00:00	00:00:10.015000	00:00:22.110000	2	0	0	8	1	0	0	0	0	0	11	0	0	00:00:47.365000	7.42231	11	00:00:04.306000	1.25641	0.214172	0	2.38818	0	1.56939	3.46474		alcTT
S20	1	61	166	175	94	39	44	222	12	47	3.88	38	37	17	59.5	203	00:00:00	00:00:28.483000	00:00:00	00:00:00	00:01:20.141000	5	0	1	5	4	0	0	0	2	1	15	3	20	00:01:58.722000	19.1196	15	00:00:07.915000	2.69415	0.265329	0	4.58706	0	0	12.9063		albTT
S21	1	69	163	167	69	33	45	208	13	41	4.22	50	45	16	56	200	00:00:00	00:00:13.148000	00:00:13.392000	00:00:04.532000	00:02:08.337000	11	1	0	2	2	0	0	0	0	2	16	2	12.5	00:02:39.409000	26.39	16	00:00:09.963000	3.3122	0.608288	0	2.17664	2.21704	0.750269	21.2461		imoFRQ
S22	1	97	180	190	110	32	50	239	4	15	7	38	42	15	52.5	190	00:00:00	00:00:00	00:00:01.610000	00:00:00	00:00:30.712000	3	1	0	0	4	0	0	0	0	1	8	1	12.5	00:00:32.322000	5.30704	8	00:00:04.040000	0	0.114481	0	0	0.26435	0	5.04269		pasFRQ
S23	1	90.3	190	190	72	21	42	207	7	22	5.23	25	33	12	42	180	00:00:00	00:00:00	00:00:00	00:00:04.975000	00:00:13.348000	2	0	0	2	2	0	0	0	1	0	6	1	16.6667	00:00:18.323000	3.02682	6	00:00:03.054000	0	0.0708542	0	0	0	0.821833	2.20499		esFRQT
S24	1	98	188	196	52	27	51	206	5	25	3.53	25	43	13	45.5	160	00:01:42.466000	00:00:00	00:00:00	00:00:01.056000	00:04:25.995000	17	0	0	0	1	1	0	0	0	1	23	3	13.0435	00:04:27.051000	44.2592	18	00:00:14.836000	0	1.20172	16.982	0	0	0.175014	44.0842		chaFRQ
S1	2	68	163	160	52	26	35	169	2	21	2.73	22	43	13.6667	47.8333	193	00:00:22.411000	00:00:00	00:00:00	00:00:11.167000	00:00:00	0	0	0	2	4	0	0	0	0	0	8	2	25	00:00:11.167000	3.64908	6	00:00:01.861000	1.20184	0.243027	7.32333	0	0	3.64908	0		alcFRQ
S2	2	89.4	179	183	107	44.5	42	216	6	60	3.42	50	42	17	59.5	197	00:00:00	00:00:00	00:00:00	00:00:03.378000	00:00:12.345000	0	0	1	0	8	0	0	0	0	1	9	1	11.1111	00:00:17.844000	5.91196	9	00:00:01.983000	2.03491	0.169864	0	0	0	1.11918	4.09006		albFRQ
S3	2	95	183	186	30	26	49	279	1	4	2.79	15	44	11	38.5	188	00:00:59.617000	00:00:00	00:00:01.839000	00:00:12.012000	00:00:00	0	1	0	1	2	0	1	0	1	0	7	4	57.1429	00:00:13.851000	4.5482	4	00:00:03.463000	2.46981	0.226874	19.5762	0	0.603866	3.94434	0		imoEXT
S4	2	90.8	178	184	27	43.5	56	255	8	47	4.41	35	41	14.1429	49.5	196	00:00:03.040000	00:00:03.662000	00:00:00	00:00:00	00:00:11.758000	0	0	0	1	4	0	0	0	1	0	6	1	16.6667	00:00:15.420000	4.76373	5	00:00:03.084000	1.38751	0.440362	0.939153	1.13131	0	0	3.63242		pasEXT
S5	2	96	175	186	46	25	45	208	4	16	3.5	18	30	12	42	191	00:00:00	00:00:00	00:00:00	00:00:04.707000	00:00:00	0	0	0	2	0	0	0	0	1	0	2	1	50	00:00:04.707000	1.55028	2	00:00:02.354000	1.51216	0.151016	0	0	0	1.55028	0		esEXTT
S6	2	68.2	170	175	82	35	50	237	14	70	3.64	31	37	16.3333	57.1667	193	00:00:00	00:00:00	00:00:00	00:00:16.108000	00:00:02.605000	0	0	0	6	1	0	0	0	1	0	7	1	14.2857	00:00:18.713000	6.76165	7	00:00:02.673000	1.30853	0.543986	0	0	0	5.82037	0.941276		chaEXT
S7	2	90.8	178	184	47	43.5	56	255	8	47	4.41	35	41	17.3333	60.6667	196	00:00:15.037000	00:00:02.423000	00:00:15.702000	00:00:13.494000	00:00:10.778000	0	2	0	6	6	0	1	0	3	2	16	7	43.75	00:00:42.397000	13.0199	14	00:00:03.028000	1.17465	0.523999	4.61778	0.744089	4.82199	4.14393	3.30986		alcEXT
S8	2	70	164	165	89	33.5	43	222	13	80	3.18	69	56	15.3333	53.6667	188	00:00:16.914000	00:00:01.559000	00:00:00	00:00:09.673000	00:00:06.410000	0	0	0	3	3	0	0	0	1	0	7	2	28.5714	00:00:17.642000	6.2473	6	00:00:02.940000	1.37919	0.585399	5.9895	0.552066	0	3.42536	2.26988		albEXT
S9	2	75.4	173	174	40	37	46	234	1	15	3.9	21	35	14	49	207	00:00:00	00:00:00	00:00:00	00:00:04.185000	00:00:06.322000	0	0	0	1	5	0	0	0	0	1	6	1	16.6667	00:00:10.507000	3.37367	6	00:00:01.751000	1.48643	0.114886	0	0	0	1.34375	2.02992		tent
S10	2	80.4	155	160	53	36	34	244	7	26	4.65	50	42	14.6667	51.3333	193	00:00:13.266000	00:00:03.218000	00:00:00	00:00:06.758000	00:00:03.803000	0	0	0	4	3	0	0	0	3	1	9	4	44.4444	00:00:13.779000	4.59367	7	00:00:01.968000	1.83588	0.139097	4.42265	1.07282	0	2.253	1.26785		exit
S11	2	65	161	161	71	40.5	37	207	7	26	2.9	50	41	12.3333	43.1667	194	00:00:56.612000	00:00:09.861000	00:00:00	00:00:00	00:00:07.992000	0	0	0	4	3	0	0	0	0	1	10	4	40	00:00:17.853000	5.85734	7	00:00:02.550000	0.935368	0.412422	18.5737	3.23527	0	0	2.62207		efet
S12	2	79.2	167	179	50	44	62	178	1	1	1.98	42	0	11.6667	40.8333	197	00:00:00	00:00:02.259000	00:00:00	00:00:11.837000	00:00:02.771000	0	0	0	2	2	0	0	0	0	0	4	0	0	00:00:16.867000	5.5791	4	00:00:04.217000	1.93064	0.322943	0	0.747209	0	3.91532	0.916563		ttAI
S13	2	68	165	170	66	30.5	50	237	15	60	2.52	65	50	17	59.5	199	00:00:00	00:00:00	00:00:00	00:00:03.170000	00:00:13.700000	0	0	1	1	6	0	0	0	0	1	8	1	12.5	00:00:21.545000	7.10334	8	00:00:02.693000	1.71833	0.232723	0	0	0	1.04514	4.51686		ttBI
S14	2	70.3	169	174	53	40	27	130	1	37	2.78	26	28	11	38.5	193	00:00:00	00:00:00.763000	00:00:00	00:00:04.029000	00:00:01.681000	0	0	0	3	1	0	0	0	1	0	4	1	25	00:00:06.473000	2.15045	4	00:00:01.618000	2.22644	0.148755	0	0.253482	0	1.33851	0.558459		ttP
S15	2	68	156	160	55	42.5	41	222	1	32	2.62	37	33	14	49	196	00:00:30.921000	00:00:00	00:00:06.467000	00:00:08.338000	00:00:02.204000	1	1	0	4	0	0	1	0	2	0	9	4	44.4444	00:00:17.009000	5.54375	6	00:00:02.835000	1.24785	0.387268	10.0781	0	2.10779	2.71761	0.718351		aiPERC
S16	2	66	173	173	64	24.5	33	200	6	30	3.3	20	46	17.3333	60.6667	198	00:00:03.621000	00:00:00	00:00:00	00:00:06.665000	00:00:00	0	0	0	2	1	0	0	0	2	0	4	2	50	00:00:06.665000	2.09219	3	00:00:02.222000	1.76239	0.184679	1.13666	0	0	2.09219	0		biPERC
																																															pperc
																																															aiNUM
																																															biNUM
																																															paNUM
																																															aiBLC
																																															biBLC
																																															pBLC
																																															ep
																																															aibi
																																															prepercentual
																																															agapercentual
																																															imopercentual
																																															paspercentual
																																															espercentualT
																																															chapercentual
																																															alcpercentual
																																															albpercentual
